# Supplementary material for: SMN promotes mitochondrial metabolic maturation during myogenesis by regulating the MYOD-miRNA axis
Source: Life Sci Alliance. 2023 Jan 5;6(3):e202201457. doi: 10.26508/lsa.202201457 (PMC9834662; doi:10.26508/lsa.202201457)
Supplement: Supplementary file 15 [file LSA-2022-01457_TableS2.xlsx]

## Sheet: Sheet1
Table S2. Oligonucleotide sequences designed for this study.
Olifonucleotide name	SOURCE
Oligonucleotides for detection of human genes
Primers for RPL13A qPCR-F: AGGTGCCTTGCTCACAGAGT	This study
Primers for RPL13A qPCR-R: GGTTGCATTGCCCTCATTAC	This study
Primers for SMN qPCR-F: CAAAAAGAAGGAAGGTGCTCACATT	This study
Primers for SMN qPCR-R: TGCTCTATGCCAGCATTTCTCCTTA	This study
Primers for the mRNA of mCherry (Exogenous MyoD1) qPCR-F: CACCATGGAGCTACTGTCGCCA	This study
Primers for the mRNA of mCherry (Exogenous MyoD1) qPCR-R: TCAGAGCACCTGGTATATCGGGT	This study
Primers for precursor mRNA of endogenous MyoD1 qPCR-F: CACTCCGGTCCCAAATGTAG	This study
Primers for precursor mRNA of endogenous MyoD1 qPCR-R: TTCCCTGTAGCACCACACAC	This study
Oligonucleotides for ChIP-qPCR of human genome
Primers for miR-1 hg ChIP-qPCR-F: CTACCTTCTCTACCTTGTGCTGAC	This study
Primers for miR-1 hg ChIP-qPCR-R: GAGAGAGAAAGAAGACACCAGGC	This study
Primers for miR-206 ChIP-qPCR-F: AACCCCATCTCCCTCCAG	This study
Primers for miR-206 ChIP-qPCR-R: GATCCTTTTGTCGGGCTTCT	This study
Primers for MyoD1 ChIP-qPCR-F: CGCCAGGATATGGAGCTACT	This study
Primers for MyoD1 ChIP-qPCR-R: CGGGTCGTCATAGAAGTCGT	This study
Oligonucleotides for detection of human micro RNA
Primers for pre-miR-1 qPCR-F: GCCACGATGGAATGTAAAGAAGT	This study
Primers for pre-miR-206 qPCR-F: GGCTCAGGCCTCACAGATTG	This study
Oligonucleotides for detection of human mitochondrial copy number
Primers for ND1 qPCR-F: AAGTCACCCTAGCATCATTCTAC	This study
Primers for ND1 qPCR-R: GCAGGAGTAATCAGAGGTGTTCTT	This study
Primers for ꞵ2M qPCR-F: TGCTGTCTCCATGTTTGATGTATCT	This study
Primers for ꞵ2M qPCR-R: TCTCTGCTCCCCACCTCTAAGT	This study
Oligonucleotides for detection of mice genes
Primers for MyoD1 qPCR-F: TTCCGGAGTGGCAGAAAGTT	This study
Primers for MyoD1 qPCR-R: AAAAAGCGCAGGTCTGGTGA	This study
Primers for Rpl13a qPCR-F: CACTCTGGAGGAGGAGAAACGGAAGG	This study
Primers for Rpl13a qPCR-R: GCAGGCATGAGGCAAACAGTC	This study
Primers for Id3 qPCR-F: TGGACGACATGAACCACTGC	This study
Primers for Id3 qPCR-R: AGCTGTCTGGATCGGGAGAT	This study
Primers for Rpl11 qPCR-F: ACACTGTCAGGTCCTTTGGC	This study
Primers for Rpl11 qPCR-R: TGGGTCGTATTTGATGCCCA	This study
Primers for Smn qPCR-F: GGCTCCGAGCAGGAAGATAC	This study
Primers for Smn qPCR-R: CTTCTGGCTGTGCCTTTTGG	This study
Oligonucleotides for ChIP-qPCR of mice genome
Primers for Distal-Linc-MD1 ChIP-qPCR-F: ATGTGTGGAAGCCTGCTCTGT	This study
Primers for Distal-Linc-MD1 ChIP-qPCR-R: GGCTGGAACCTGCATCTAGGG	This study
Primers for Proximal-Linc-MD1 ChIP-qPCR-F: GCCAGTTCGGGACCCTTCTT	This study
Primers for Proximal-LincMD1 ChIP-qPCR-R: TGGCCAATCACCTGCGTCAC	This study
Primers for Site1-miR1-1 hg ChIP-qPCR-F: GAAAACCAGTGGCTCTGTTGC	This study
Primers for Site1-miR1-1 hg ChIP-qPCR-R: AGGCGACACCAACTCATTCC	This study
Primers for Site2-miR1-1 hg ChIP-qPCR-F: ACATGGGCCTTTAGGGGACTA	This study
Primers for Site2-miR1-1 hg ChIP-qPCR-R: CTGTCCGAATCCCCCTGCTA	This study
Primers for Site1-MyoD1 ChIP-qPCR-F: ACTGCCACCGATTCATTTGTGC	This study
Primers for Site1-MyoD1 ChIP-qPCR-R: GACCTCGGACTCCACTCTGGT	This study
Primers for Site2-MyoD1 ChIP-qPCR-F: AGGCTTGCTCACCTAGACCTTCT	This study
Primers for Site2-MyoD1 ChIP-qPCR-R: GCTCACTTCGGAGCTGACCT	This study
Primers for Site1-Id3 ChIP-qPCR-F: TTCTGCAATCTCAGCGCCTA	This study
Primers for Site1-Id3 ChIP-qPCR-R: AGGAATTAGTGCCGCCTTGT	This study
Primers for Site2-Id3 ChIP-qPCR-F: ATTCCTGACGCCAGTGAGTC	This study
Primers for Site2-Id3 ChIP-qPCR-R: ACCCACAGCTCTGAGGTCAT	This study
Primers for Site1-Rpl11 ChIP-qPCR-F: ACATACCAGCATCGGACAAC	This study
Primers for Site1-Rpl11 ChIP-qPCR-R: GAGGCGGGCTTTTCTTCTAGG	This study
Primers for Site2-Rpl11 ChIP-qPCR-F: AAGCCTTCTCTCTAGCCCTTTG	This study
Primers for Site2-Rpl11 ChIP-qPCR-R: TGGGCAAAAGACTAGGTCGTG	This study
Oligonucleotides for detection of mice micro RNA
Primers for miR1-1 hg qPCR-F: GACCCCGATCCCAATCTTGT	This study
Primersfor miR1-1 hg qPCR-R: GTCAGGCCATAGGAACACCA	This study
Primers for Linc-MD1 qPCR-F: AGGAAGACGGACTTGGTTCC	This study
Primers for Linc-MD1 qPCR-R: CCCAGGTTCTATGCTCCTCAA	This study
Primers for pre-miR-1 qPCR-F: GCTTGGGACACATACTTCTT	This study
Primersfor pre-miR-1 qPCR-R: GCCTGAAATACATACTTCTTTACAT	This study
Primers for pre-miR-206 qPCR-F: GGAATGTAAGGAAGTGTGTG	This study
micro RNA mimics
Ms-miR1a_s: ACAUACUUCUUUAUAUGCCCAUA	GeneDessign, lnc.
Ms-miR206_s: ACAUGCUUCUUUAUAUCCUAUA	GeneDessign, lnc.
